# Supplementary material
Source: PubMed Central journal article supplement (PMC1326417)

## Supplementary Figures

**Suppl. Fig. 1** HUB1-protein adduct formation does not depend on the cysteine residue of HUB1. Western blot probed with anti-HA antibodies of *hub1Δ* cells containing empty vector (control) or expressing N-terminally HA-tagged WT HUB1 (HUB1) or a HUB1 variant in which the unique cysteine residue of HUB1 has been replaced by an alanine residue. The three right lanes are from cells grown for 30 min in 10 mM NEM before harvesting.

**Suppl. Fig. 2** HUB1-protein adducts are part of larger protein complexes. Gel filtration analysis (Superose 6) of HUB1-protein adducts from 100,000 × *g* supernatants of lysates of cells expressing 3HA-tagged HUB1. Fractions were analyzed by SDS-PAGE and Western blotting using anti-HA antibodies. Calibration of the column was performed using thyroglobulin (669 kDa), ferritin (440 kDa), catalase (232 kDa), and ovalbumin (43 kDa) as standards.

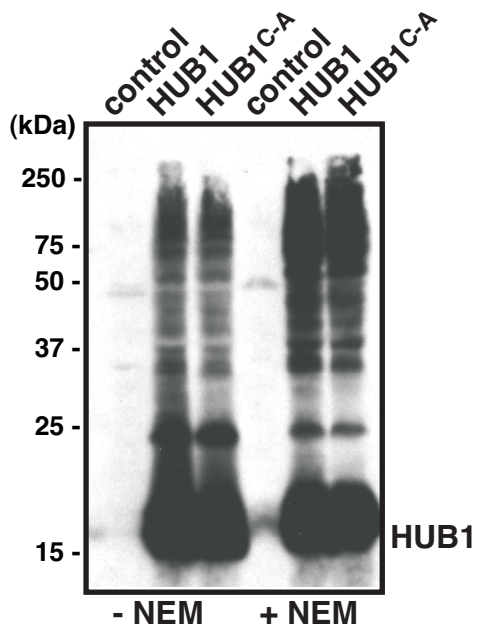

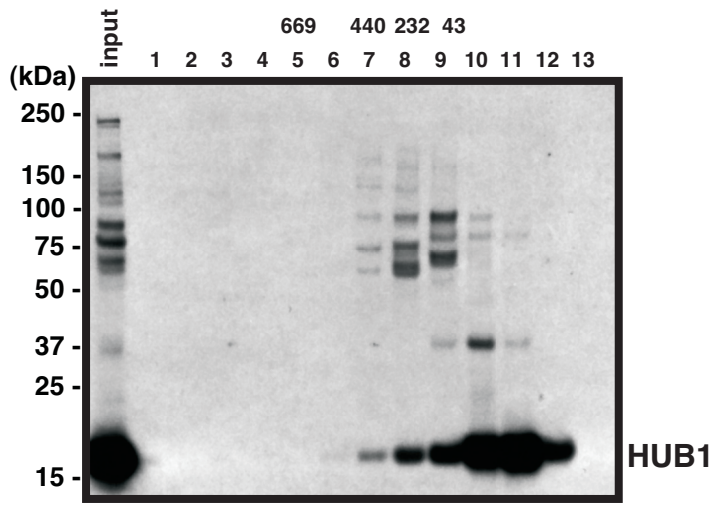

Supplement: 4-7400025-s1.pdf [file 4-7400025-s1.pdf]
